# Supplementary material for: Histone methyltransferase Ash1L mediates activity-dependent repression of neurexin-1α
Source: PubMed Central journal article supplement (PMC4882582; doi:10.1038/srep26597), 2016-05-27
Supplement: srep26597-s1.pdf [file srep26597-s1.pdf]

## **Histone methyltransferase Ash1L mediates activity-dependent repression of neurexin-1 $\alpha$**

Tao Zhu<sup>#</sup>, Chen Liang<sup>#</sup>, Dongdong Li, Miaomiao Tian, Sanxiong Liu, Guanjun Gao, Ji-Song Guan\*

MOE Key Laboratory of Protein Sciences, Tsinghua-Peking Center for Life Sciences, School of Life Sciences, Center for Brain-Inspired Computing Research, IDG/McGovern Institute for Brain Research, Tsinghua University, Beijing 100084, China.

\* Please address correspondence to:

Ji-Song Guan, Ph.D.

School of Life Sciences

Medical Science Building, Room D206

Tsinghua University

Beijing, 100084, P.R.China

Tel: 86-10-62785905

Fax: 86-10-62785905

Email: [jsguan@mail.tsinghua.edu.cn](mailto:jsguan@mail.tsinghua.edu.cn)

<sup>#</sup> These authors contributed equally to this work

**Conflict of interest:** The authors declare no competing financial interests.

## Figure legends

### **Figure S1. Activity-dependent repression of *nrxn1 $\alpha$* in primary cortical neuron culture.** Figure 1A.

RT-PCR analysis of the *nrxns* and other gene transcripts in primary cortical neuron cultures 24 hours after stimuli by high  $K^+$  (51mM, 10min). Real-time qPCR analysis revealed a decrease of *nrxn1 $\alpha$*  and *nrxn3 $\beta$*  mRNA after high  $K^+$  stimulation. Figure 1B. Primary cortical neuron cultures were subjected to transient stimulation by KCl or NaCl on DIV9. The *nrxn1 $\alpha$*  expression was analyzed by RT-PCR after stimulation.

### **Figure S2. Synthetic ZFP-based chromatin purification identified Ash1L as the transcriptional**

#### **regulator of *nrxn1 $\alpha$* in mouse brain.** Figure. 2A. Electrophoretic mobility shift assays was performed

to test the binding capacity of the designed GST-ZFP-*nrxn1 $\alpha$* . The PCR product of *nrxn1 $\alpha$*  promoter fragment (*nrx1 $\alpha$*  promoter) was incubated with GST-ZFP-*nrxn1 $\alpha$*  or GST at indicated concentrations.

Lane 1, no protein; lane 2-6, 0.02, 0.04, 0.08, 0.12, 0.16  $\mu$ M GST-ZFP-*nrxn1 $\alpha$*  respectively; lane 7-10, 0.04, 0.08, 0.12, 0.16  $\mu$ M GST respectively. Figure 2B. Competition assays for EMSA. The DNA

probes with different paired-end tags were incubated with 0.08  $\mu$ M GST-ZFP-*nrxn1 $\alpha$* . Figure 2C. The shift bands were subjected to semi-quantitative PCR to identify the ID of binding probes. Figure 2F.

PCR from purified chromatins showed specific enrichment of the promoter region of *nrxn1 $\alpha$*  in GST-ZFP-*nrxn1 $\alpha$*  pull-down samples. Figure 2G. Proteins associated with the *nrxn1 $\alpha$*  promoter were

resolved by the SDS-PAGE and silver staining. Figure 2H. ChIP analysis showed the identified proteins specific enriched at *nrxn1 $\alpha$*  promoter in the hippocampus of 3-month-old C57BL/6 mice.

### **Figure S3. Neuronal activity recruits Ash1L and H3K36me2 to the *nrxn1 $\alpha$* promoter.** Figure 3A-

3B. ChIP experiments revealed the changes of histone modifications (3A) and Ash1L (3B) in the *nrxn1 $\alpha$*  promoter 24 hours after high  $K^+$  stimuli in primary neuronal cultures (E16, ICR strain).

**Figure S4. Knockdown of Ash1L reduced neuronal activity-induced repression of nrxn1 $\alpha$ .** Figure

4C Reduction of protein levels 48 hours after induction in NG108-15 cells.

**Figure S5. The generation of the Ash1L mutant mice.** Figure 5B. A primer-pair of Ash1L-Mt-F/R

was used to distinguish between the wild-type allele and the 11 deletion allele. Figure 5D. Western blot

analysis of Ash1L in the motor cortex and hippocampus in 3-month-old WT mice and *Ash1L* (-/+)

mice. Figure S5D. Western blot analysis of Ash1L in the thalamus and hypothalamus in 3-month-old

WT mice and *Ash1L* (-/+) mice.

**Figure S6. Increased nrxn1 expression and reduced H3K36me2 at the nrxn1 $\alpha$  promoter in the**

**hippocampus of *Ash1L* (-/+) mice.** Figure 6B. Samples from the hippocampus showed no changes in

histone methylation level in *Ash1L* (-/+) mice.

**Figure S7. Ash1L mediated the activity-dependent repression of nrxn1 $\alpha$ .** Figure 7A. PCR

genotyping of E14 embryos from *Ash1L* (-/+) intercrosses.

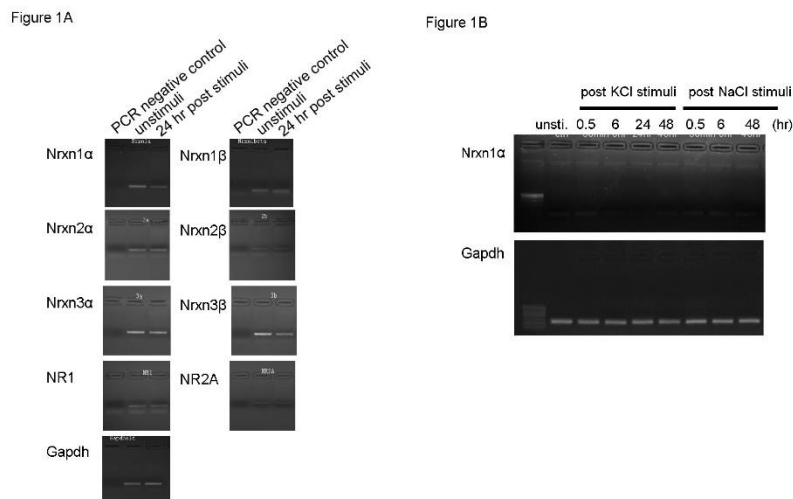

**Figure S1.** Full-length gels of Figure 1.

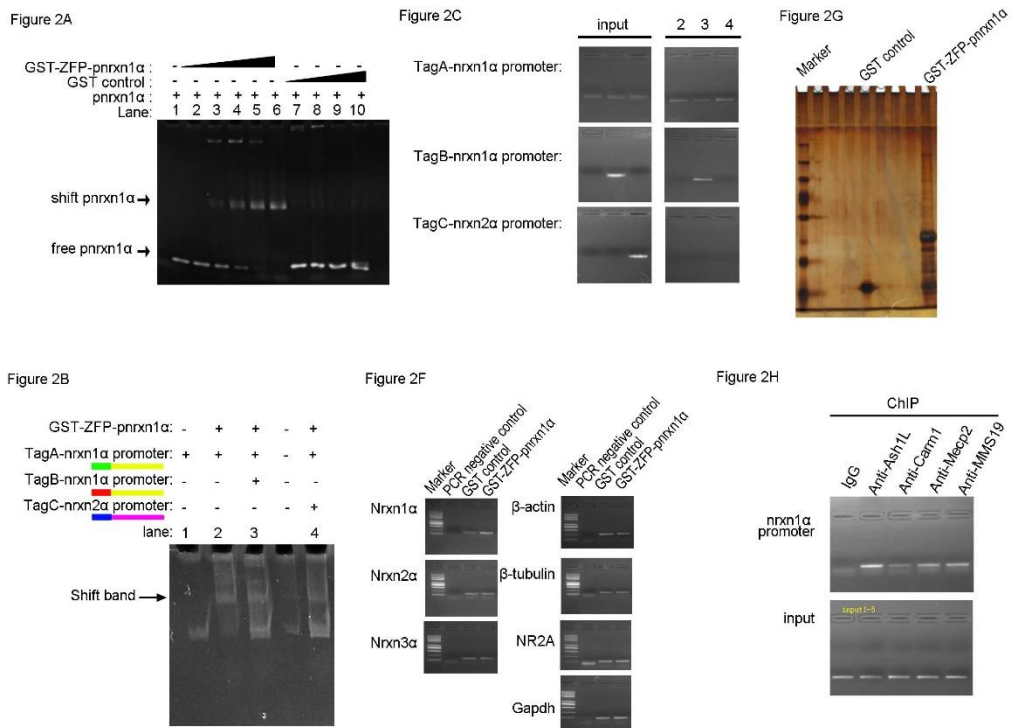

**Figure S2.** Full-length gels of Figure 2.

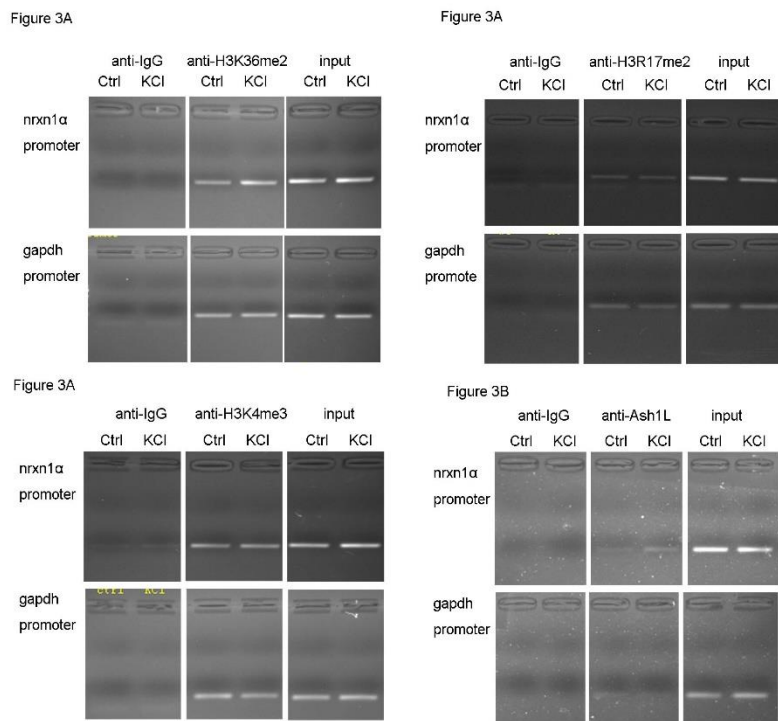

**Figure S3.** Full-length gels of Figure 3.

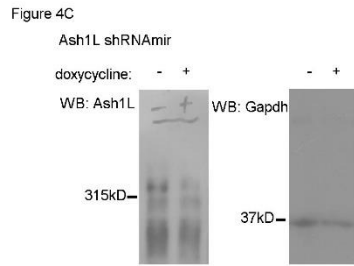

**Figure S4.** Full-length Western blots of Figure 4.

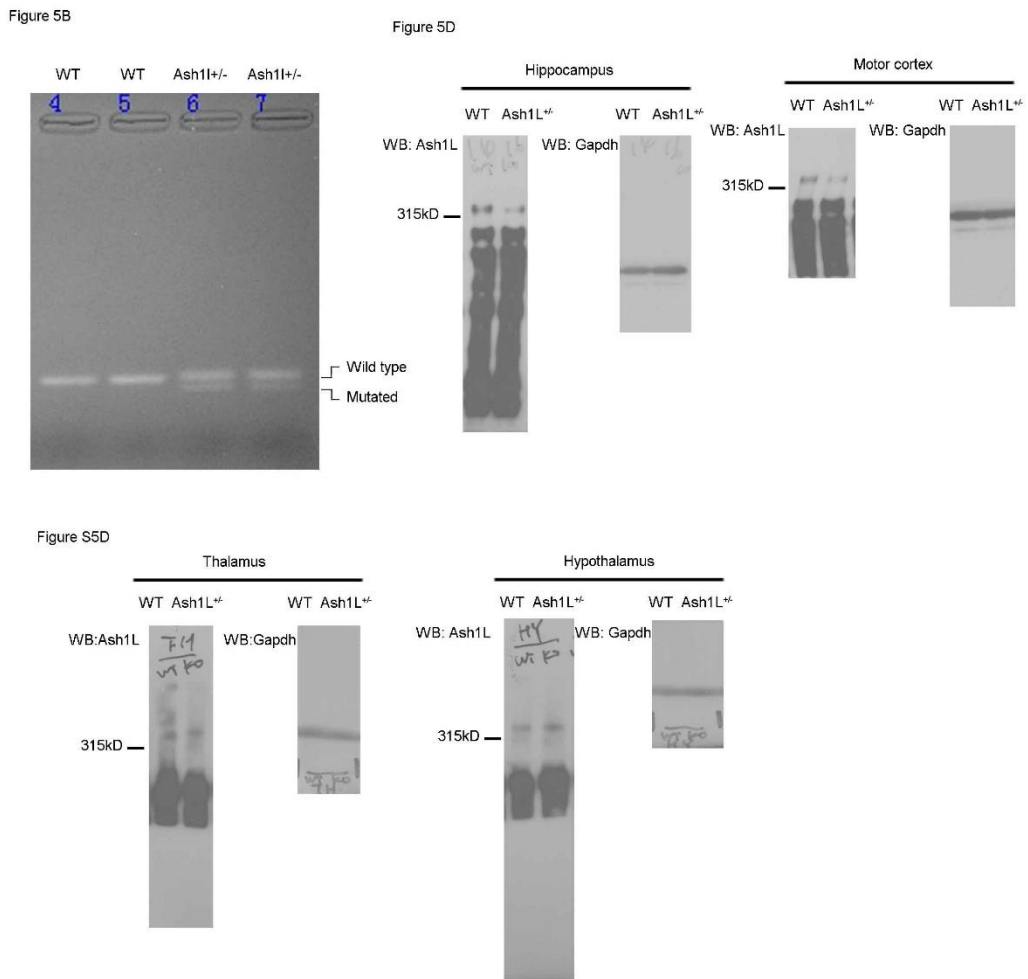

**Figure S5.** Full-length gel and Western blots of Figure 5.

Figure 6B

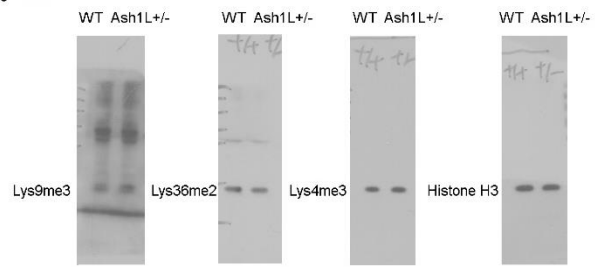

**Figure S6.** Full-length Western blots of Figure 6B.

Figure 7A

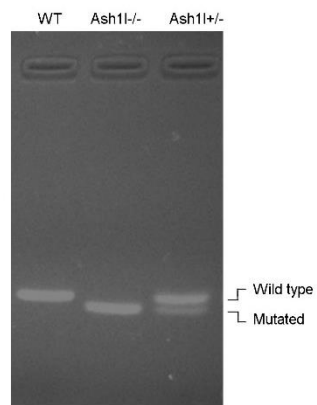

**Figure S7.** Full-length gel of Figure 7.
